# Supplementary material for: CUL2LRR1, TRAIP and p97 control CMG helicase disassembly in the mammalian cell cycle
Source: PubMed Central journal article supplement (PMC7926238; doi:10.15252/embr.202052164), 2021-02-15
Supplement: EMBR-22-e52164-s001.pdf [file EMBR-22-e52164-s001.pdf]

## Table of Contents

|                    |        |
|--------------------|--------|
| Appendix Figure S1 | Page 2 |
| Appendix Figure S2 | Page 3 |
| Appendix Figure S3 | Page 4 |
| Appendix Table S1  | Page 5 |

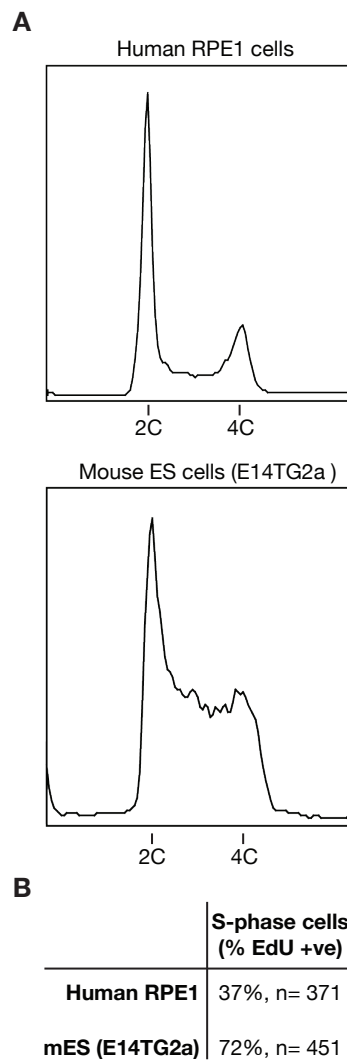

**Comparison of the proportion of S-phase cells in asynchronous populations of diploid E14TG2a mouse ES cells and human RPE1 cells.**

(A) Flow cytometry analysis of DNA content for asynchronously growing E14TG2a mouse ES cells and human RPE1 cells.  
(B) Proportion of S-phase cells, monitored by quantifying cells that incorporated a pulse of 5-Ethynyl-2'-deoxyuridine (EdU), as described in Materials and Methods.

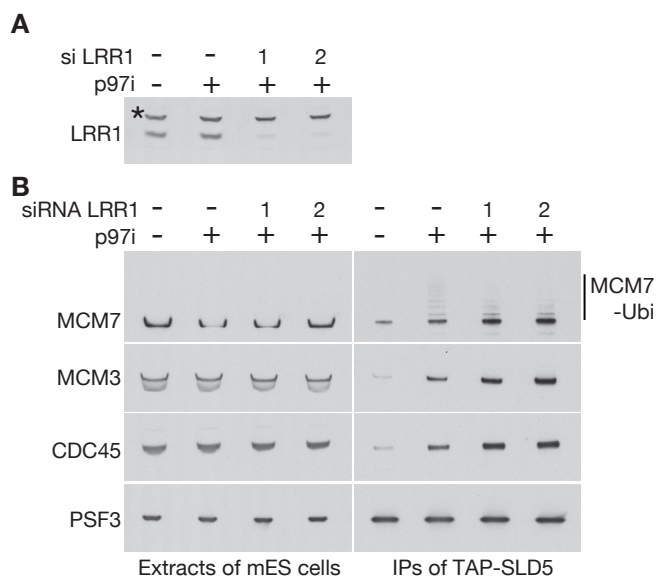

**Comparison of two different siRNA for LRR1.**

(A) TAP-SLD5 cells were treated with the indicated siRNA (see Appendix Table S1 – siRNA2 was used in all other such experiments) and depletion of LRR1 was monitored by immunoblotting. The asterisk indicates a non-specific band.

(B) TAP-SLD5 was isolated from cell extracts by immunoprecipitation. The indicated proteins were monitored by immunoblotting

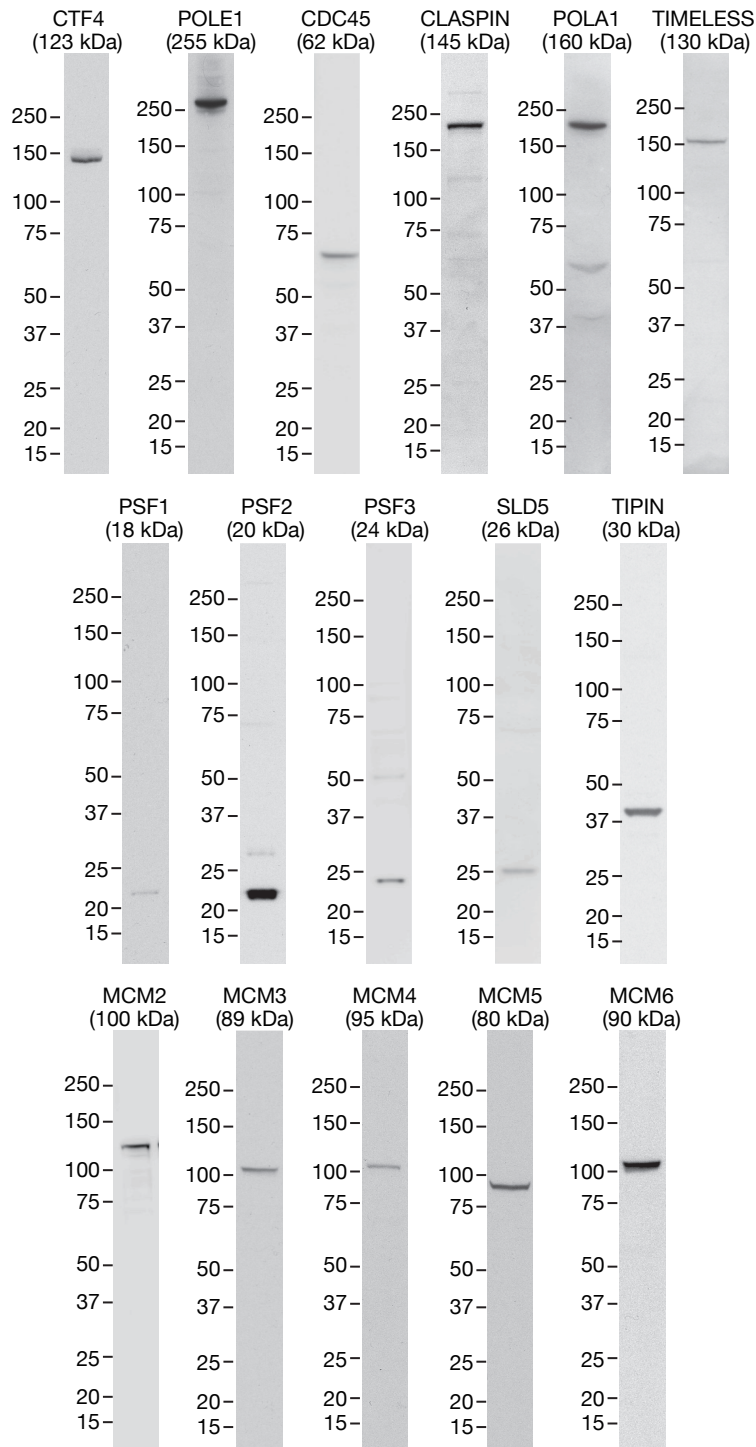

**Validation of antibodies produced in this study.**

The indicated antibodies were tested via immunoblotting of extracts of mouse ES cells.

The antibody to LRR1 is validated in Figure 3B and Figure EV2C, whereas the antibodies to TRAP are confirmed in Figure 5C and Figure EV4E. See Appendix Table S1 for more details.

## Appendix Table S1

Reagents and resources used in this study.

| REAGENT or RESOURCE                                                                                       | SOURCE                              | IDENTIFIER |
|-----------------------------------------------------------------------------------------------------------|-------------------------------------|------------|
| <b>Antibodies</b>                                                                                         |                                     |            |
| MCM2 [antigen 1-222 mouse]<br>Use 1 in 5,000 for immunoblotting                                           | MRC PPU<br>Reagents and<br>Services | DU24572    |
| MCM3 [antigen 1-222 mouse]<br>Use 1 in 1,000 for immunoblotting                                           | MRC PPU<br>Reagents and<br>Services | DU51847    |
| MCM4 [antigen 1-222 mouse]<br>Use 1 in 3,000 for immunoblotting                                           | MRC PPU<br>Reagents and<br>Services | DU51810    |
| MCM5 [antigen 1-222 mouse]<br>Use 1 in 3,000 for immunoblotting                                           | MRC PPU<br>Reagents and<br>Services | DU51792    |
| MCM6 [antigen 1-222 mouse]<br>Use 1 in 3,000 for immunoblotting                                           | MRC PPU<br>Reagents and<br>Services | DU51793    |
| MCM7 [antigen 1-719 human]<br>Use 1 in 500 for immunoblotting                                             | Santa Cruz<br>Biotechnology         | sc-9966    |
| PSF1 [antigen 1-196 mouse]<br>Use 1 in 3,000 for immunoblotting                                           | MRC PPU<br>Reagents and<br>Services | DU51938    |
| PSF2 [antigen 1-185 mouse]<br>Use 1 in 3,000 for immunoblotting                                           | MRC PPU<br>Reagents and<br>Services | DU51832    |
| PSF3 [antigen 1-216 mouse]<br>Use 1 in 1,000 for immunoblotting                                           | MRC PPU<br>Reagents and<br>Services | DU24601    |
| SLD5 [antigen 1-223 mouse]<br>Use 1 in 2,000 for immunoblotting                                           | MRC PPU<br>Reagents and<br>Services | DU24572    |
| CDC45 [antigen 1-222 mouse]<br>Use 1 in 1,000 for immunoblotting                                          | MRC PPU<br>Reagents and<br>Services | DU35753    |
| CTF4 [antigen 781-1001 mouse]<br>Use 1 in 1,000 for immunoblotting<br>Use 1 in 100 for immunofluorescence | MRC PPU<br>Reagents and<br>Services | DU56612    |
| CLASPIN [antigen 1-222 mouse]<br>Use 1 in 1,000 for immunoblotting<br>Use 1 in 100 for immunofluorescence | MRC PPU<br>Reagents and<br>Services | DU56412    |
| TIMELESS [antigen 1-222 mouse]<br>Use 1 in 500 for immunoblotting                                         | MRC PPU<br>Reagents and<br>Services | DU56427    |

|                                                                                                         |                                     |            |
|---------------------------------------------------------------------------------------------------------|-------------------------------------|------------|
| TIPIN [antigen 1-222 mouse]<br>Use 1 in 3,000 for immunoblotting                                        | MRC PPU<br>Reagents and<br>Services | DU56426    |
| POLA1 [antigen 222-443 mouse]<br>Use 1 in 3,000 for immunoblotting                                      | MRC PPU<br>Reagents and<br>Services | DU47647    |
| POLE1 [antigen 1-222 mouse]<br>Use 1 in 1,000 for immunoblotting<br>Use 1 in 100 for immunofluorescence | MRC PPU<br>Reagents and<br>Services | DU27959    |
| LRR1 [antigen 1-160 mouse]<br>Use 1 in 500 for immunoblotting                                           | MRC PPU<br>Reagents and<br>Services | DU51811    |
| TRAIP [antigen 311-470 mouse]<br>Use 1 in 2,000 for immunoblotting                                      | MRC PPU<br>Reagents and<br>Services | DU62040    |
| TRAIP [antigen 1-204 human]<br>Use 1 in 1,000 for immunoblotting                                        | Protein-tech                        | 10332-1-AP |
| VHL [antigen 1-181 mouse]<br>Use 1 in 1,000 for immunoblotting                                          | Santa Cruz<br>Biotechnology         | sc-55506   |
| HP1 [antigen 1-191 human]<br>Use 1 in 100 for immunofluorescence                                        | Santa Cruz<br>Biotechnology         | sc-515341  |
| anti-sheep IgG HRP [from donkey]<br>Use 1 in 10,000 for immunoblotting                                  | Sigma-Aldrich                       | A3415      |
| anti-mouse IgG HRP [from goat]<br>Use 1 in 10,000 for immunoblotting                                    | Sigma-Aldrich                       | A4416      |
| anti-rabbit IgG HRP [from goat]<br>Use 1 in 10,000 for immunoblotting                                   | Sigma-Aldrich                       | A6667      |
| anti-sheep IgG Alexa Fluor 594 [from donkey]<br>Use 1 in 1,000 for immunofluorescence                   | Invitrogen                          | A11016     |
| anti-mouse IgG Alexa Fluor 594 [from donkey]<br>Use 1 in 1,000 for immunofluorescence                   | Invitrogen                          | A21203     |
| <b>Chemicals, Peptides, and Recombinant<br/>Proteins</b>                                                |                                     |            |
| LIF                                                                                                     | MRC PPU<br>Reagents and<br>Services | DU1715     |
| Ubiquitin PrG                                                                                           | MRC PPU<br>Reagents and<br>Services | DU49003    |
| USP2                                                                                                    | MRC PPU<br>Reagents and<br>Services | DU32888    |
| CB-5083                                                                                                 | Selleckchem                         | S8101      |
| MLN-4924                                                                                                | Activebiochem                       | A1139      |
| MMC                                                                                                     | Duchefa<br>Biochemie                | M0133      |

|                                                                                                        |            |        |
|--------------------------------------------------------------------------------------------------------|------------|--------|
| S-Trityl-L-cysteine (STLC)                                                                             | Sigma      | 164739 |
| Thymidine                                                                                              | Sigma      | T9250  |
| <b>Experimental Models: Organisms/Strains</b>                                                          |            |        |
| E14tg2A mouse ES cells                                                                                 |            | N/A    |
| E14tg2A <i>TAP-SLD5</i>                                                                                | This study | N/A    |
| E14tg2A <i>GFP-SLD5</i>                                                                                | This study | N/A    |
| E14tg2A <i>TRAIPΔ</i>                                                                                  | This study | N/A    |
| E14tg2A <i>GFP-SLD5 TRAIPΔ</i><br><i>ROSA26::TRAIP</i>                                                 | This study | N/A    |
| E14tg2A <i>GFP-SLD5 TRAIPΔ</i><br><i>ROSA26::TRAIP<sup>R</sup></i> (W37F RING mutant of TRAIP)         | This study | N/A    |
| E14tg2A <i>GFP-SLD5 TRAIPΔ</i><br><i>ROSA26::TRAIP<sup>PIP</sup></i> (Q461A L464A PIP mutant of TRAIP) | This study | N/A    |
| E14tg2A <i>GFP-SLD5 mCHERRY-Histone H2B</i>                                                            | This study | N/A    |
| E14tg2A <i>GFP-SLD5 mCHERRY-Histone H2B TRAIPΔ</i>                                                     | This study | N/A    |
| E14tg2A <i>GFP-SLD5 mCHERRY-PCNA</i>                                                                   | This study | N/A    |
| hTERT RPE-1 human retinal pigment epithelial cells                                                     |            | N/A    |
| <b>Oligonucleotides</b>                                                                                |            |        |
| SLD5 gRNA1_oligo 1<br>caccgCTCCGTCATCGTTTCTCAAC                                                        | This study | N/A    |
| SLD5 gRNA1_oligo 2<br>aaacGTTGAGAAACGATGACGGAGc                                                        | This study | N/A    |
| SLD5 gRNA2_oligo 1<br>caccgTCCGTCATCGTTTCTCAACC                                                        | This study | N/A    |
| SLD5 gRNA2_oligo 2<br>aaacGGTTGAGAAACGATGACGGAc                                                        | This study | N/A    |
| SLD5 gRNA3_oligo 1<br>caccgACGGAGGTTCTGGATCTCCA                                                        | This study | N/A    |
| SLD5 gRNA3_oligo 2<br>aaacTGGAGATCCAGAACCTCCGTc                                                        | This study | N/A    |
| TRAIP gRNA1_oligo 1<br>caccgCAGAGCGCGGATAGGCATGA                                                       | This study | N/A    |
| TRAIP gRNA1_oligo 2<br>aaacTCATGCCTATCCGCGCTCTGc                                                       | This study | N/A    |
| TRAIP gRNA2_oligo 1<br>caccgCTTCGATCACTCCCGTGACG                                                       | This study | N/A    |
| TRAIP gRNA2_oligo 2<br>aaacCGTCACGGGAGTGATCGAAGc                                                       | This study | N/A    |
| ROSA26 gRNA1_oligo 1<br>caccgACTGGAGTTGCAGATCACG                                                       | This study | N/A    |
| ROSA26 gRNA1_oligo 2<br>aaacCGTGATCTGCAACTCCAGTc                                                       | This study | N/A    |

|                                                                                        |                               |             |
|----------------------------------------------------------------------------------------|-------------------------------|-------------|
| SLD5 PCR_oligo 1<br>TTCTTGCAAGTAAGTGGGAGAAGC                                           | This study                    | N/A         |
| SLD5 PCR_oligo 2<br>CAATGAGCTCTGCAGGAGTTAGGAC                                          | This study                    | N/A         |
| TRAIP PCR_oligo 1<br>GTTATTCCTTCCGGTTCCTACTACCGG                                       | This study                    | N/A         |
| TRAIP PCR_oligo 2<br>CCGACACCCCCATAGCGTCTAAGTG                                         | This study                    | N/A         |
| ROSA26 PCR_oligo 1<br>CCTGCAGGACAACGCCACACAC                                           | This study                    | N/A         |
| ROSA26 PCR_oligo_2<br>TGAGGACCGCCCTGGGCCTGGG                                           | This study                    | N/A         |
| LRR1 siRNA # 1<br>CAACAUUUGACUCGAAUUU                                                  | Horizon Discovery             | J-057816-09 |
| LRR1 siRNA # 2<br>CGACUACAAUGAACCUACA                                                  | Horizon Discovery             | J-057816-10 |
| VHL siRNA pool                                                                         | Horizon Discovery             | L-040755-00 |
| <b>Recombinant DNA (Plasmids)</b>                                                      |                               |             |
| pX335 [expression vector for gRNA and Cas9-D10A 'nickase']                             | Pyzocha et al (2014)          | Addgene     |
| pKN7 [expression vector for gRNA and Puromycin-resistance gene]                        | MRC PPU Reagents and Services | DU70250     |
| pKN101 [expression vector for gRNA, Cas9-D10A 'nickase' and Puromycin-resistance gene] | MRC PPU Reagents and Services | DU70263     |
| pKN42 [gRNA1 SLD5; based on pX335]                                                     | MRC PPU Reagents and Services | DU70251     |
| pKN150 [gRNA2 SLD5; based on pKN101]                                                   | MRC PPU Reagents and Services | DU70252     |
| pKN43 [gRNA3 SLD5; based on pKN7]                                                      | MRC PPU Reagents and Services | DU70253     |
| pFV79 [gRNA1 TRAIP; based on pX335]                                                    | MRC PPU Reagents and Services | DU70254     |
| pFV76 [gRNA2 TRAIP; based on pKN7]                                                     | MRC PPU Reagents and Services | DU70255     |
| pKN88 [gRNA ROSA26; based on pKN101]                                                   | MRC PPU Reagents and Services | DU70256     |



|                                                       |                                     |                                                                     |
|-------------------------------------------------------|-------------------------------------|---------------------------------------------------------------------|
| pKN161 [donor vector for TAP-SLD5]                    | MRC PPU<br>Reagents and<br>Services | DU70257                                                             |
| pRF011 [donor vector for GFP-SLD5]                    | MRC PPU<br>Reagents and<br>Services | DU70258                                                             |
| pRF014 [donor vector for TRAIP WT]                    | MRC PPU<br>Reagents and<br>Services | DU70259                                                             |
| pRF027 [donor vector for TRAIP <sup>R</sup> ]         | MRC PPU<br>Reagents and<br>Services | DU70260                                                             |
| pRF039 [donor vector for TRAIP <sup>PIP</sup> ]       | MRC PPU<br>Reagents and<br>Services | DU70261                                                             |
| pRF010 [donor vector for mCHERRY-H2B]                 | MRC PPU<br>Reagents and<br>Services | DU70262                                                             |
| pcDNA3.1-mCherry-PCNA [donor vector for mCHERRY-PCNA] | Masato Kanemaki                     | N/A                                                                 |
| <b>Software and Algorithms</b>                        |                                     |                                                                     |
| ImageJ                                                | National Institute<br>of Health     | <a href="https://imagej.nih.gov/ij/">https://imagej.nih.gov/ij/</a> |
