# Supplementary material for: CUL2LRR1, TRAIP and p97 control CMG helicase disassembly in the mammalian cell cycle
Source: PubMed Central journal article supplement (PMC7926238; doi:10.15252/embr.202052164), 2021-02-15
Supplement: EMBR-22-e52164-s002.pdf [file EMBR-22-e52164-s002.pdf]

## Expanded View Figures

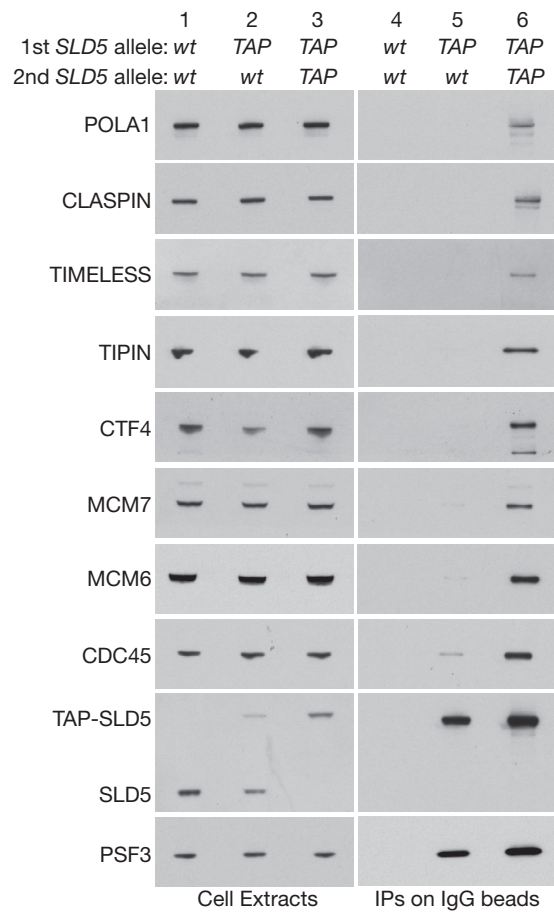

**Figure EV1. GINS co-purifies with a range of replisome components from homozygous *TAP-*SLD5** mouse ES cells.**

Cell extracts from mouse ES lines with the indicated genotypes were incubated with IgG beads. The isolated proteins were analysed by immunoblotting in order to monitor the factors that co-purified with *TAP-*SLD5**. Note that isolation of the CMG was more effective from homozygous *TAP-*SLD5** / *TAP-*SLD5** cells than from the equivalent heterozygote

**A**

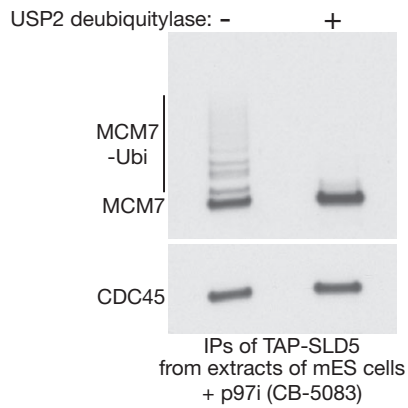

**B**

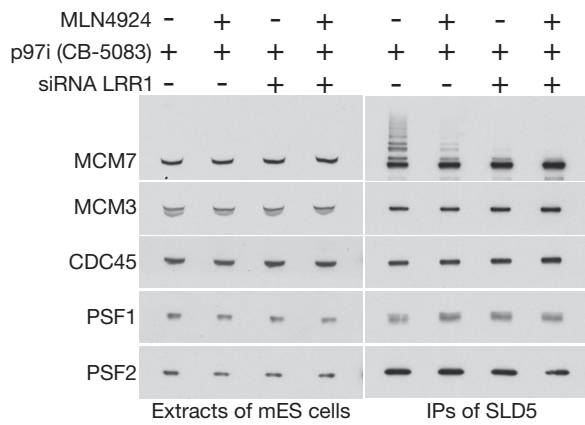

**C**

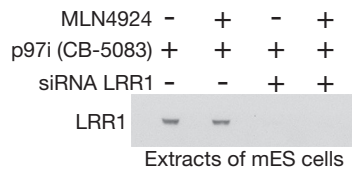

**Figure EV2. Ubiquitylation of CMG-MCM7 by CUL2<sup>LRR1</sup>.**

- A Ubiquitylated CMG was isolated from extracts of mouse ES cells treated with 5 μM CB-5083, by immunoprecipitation of TAP-SLD5. Subsequently, the immunoprecipitates were treated with the USP2 deubiquitylase as indicated, confirming that the observed modifications of CMG-MCM7 corresponded to ubiquitylation.
- B TAP-SLD5 cells were treated as indicated and TAP-SLD5 was then isolated from cell extracts by immunoprecipitation. The indicated proteins were monitored by immunoblotting.
- C Depletion of LRR1 was monitored by immunoblotting for the experiment in (B).

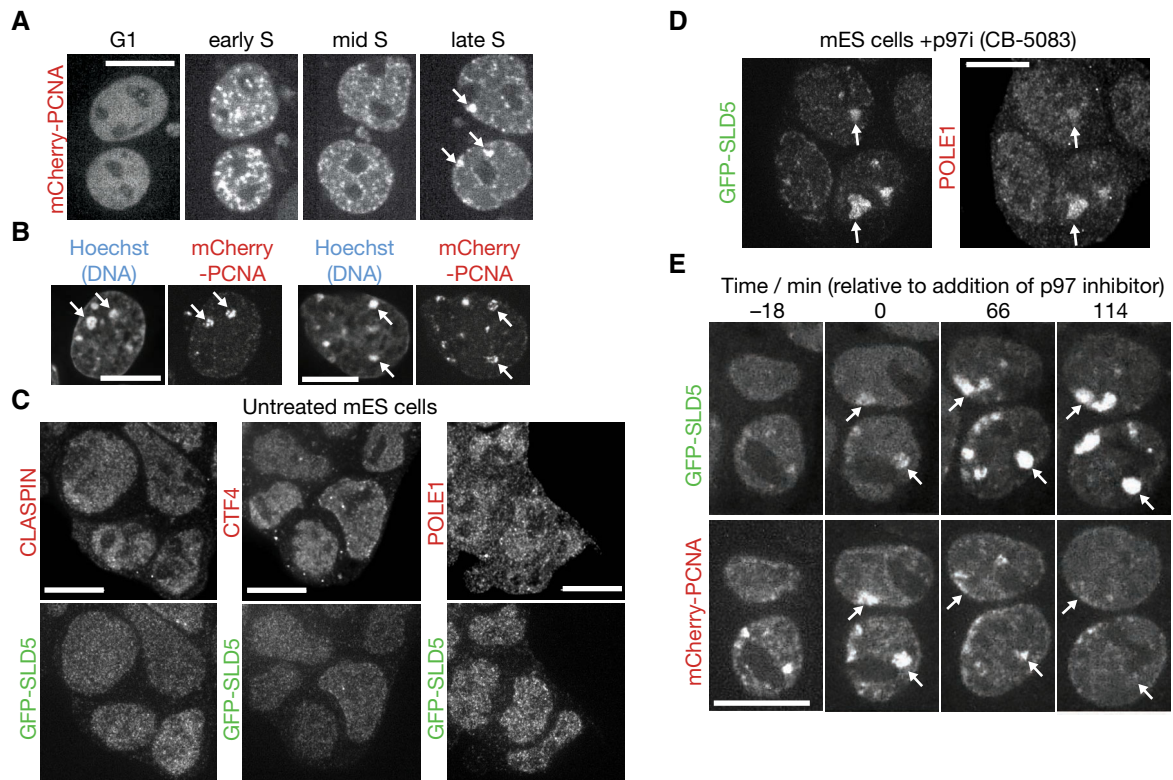

**Figure EV3. Accumulation of replisome components on chromatin in response to p97 inhibition.**

- A Time-lapse analysis of mCherry-PCNA as mouse ES cells enter and progress through S-phase (arrows denote large patches that are seen in late S-phase).
- B Cells expressing mCherry-PCNA were fixed and stained with Hoechst, revealing that large mCherry-PCNA patches in late S-phase correspond to replication of constitutive heterochromatin (examples marked by arrows). In 94% of cells with large PCNA patches, these co-localised with condensed DNA,  $n = 53$ .
- C The indicated replisome factors were analysed by immunofluorescence in untreated mouse ES cells expressing GFP-SLD5.
- D Similar experiment to that in (C), using cells treated with  $5 \mu\text{M}$  CB-5083. The arrows indicate the co-localisation of POLE1 and GFP-SLD5 on heterochromatic patches (88% of cells,  $n = 49$ ).
- E Time-lapse analysis of mouse ES cells expressing GFP-SLD5 and mCherry-PCNA, following treatment with the p97 inhibitor CB-5083. The arrows illustrate the persistence of GFP-SLD5 on heterochromatic patches after the disappearance of mCherry-PCNA (100% of cells,  $n = 77$ ).

Data information: Scale bars in all panels correspond to  $10 \mu\text{m}$ .

**Figure EV4. *TRAIP*<sup>-/-</sup> mouse ES cells are viable but are sensitive to DNA damaging agents that induce inter-strand DNA crosslinks.**

- A Procedure for creating small deletion at 5' end of first exon of the *TRAIP* gene in mouse ES cells.
- B Location of gRNAs that were used to target the Cas9-D10A "nickase" to the *TRAIP* locus. The panel also indicates the location of two PCR oligos that were used subsequently to check the integrity of the targeted region.
- C PCR analysis of genomic DNA from cells transfected with DNA expressing Cas9-D10A and the indicated gRNA(s) from (B).
- D DNA sequence analysis of the targeted region from control cells and two clones exposed to Cas9-D10A in the presence of gRNAs 1 + 2 (PAM = Protospacer Adjacent Motif). See Materials and Methods for further details.
- E Immunoblots of cell extracts from control cells and *TRAIP* $\Delta$  clones, using the indicated anti-*TRAIP* antibodies. Asterisks indicate non-specific bands.
- F (i) Flow cytometry analysis of DNA content for asynchronously growing wild-type and *TRAIP*<sup>-/-</sup> mouse ES cells. (ii) Doubling times were calculated as described in Materials and Methods.
- G Procedure for expressing wild-type or mutated *TRAIP* at the *ROSA26* locus in *TRAIP*<sup>-/-</sup> cells.
- H Cells with the indicated genotypes were grown for 24 h in the presence of varying concentrations of the DNA damaging agent Mitomycin C as shown, before continued growth in the absence of drug.

Data Information: In (F), the doubling time data are presented as the mean values of three experiments  $\pm$  standard deviation.

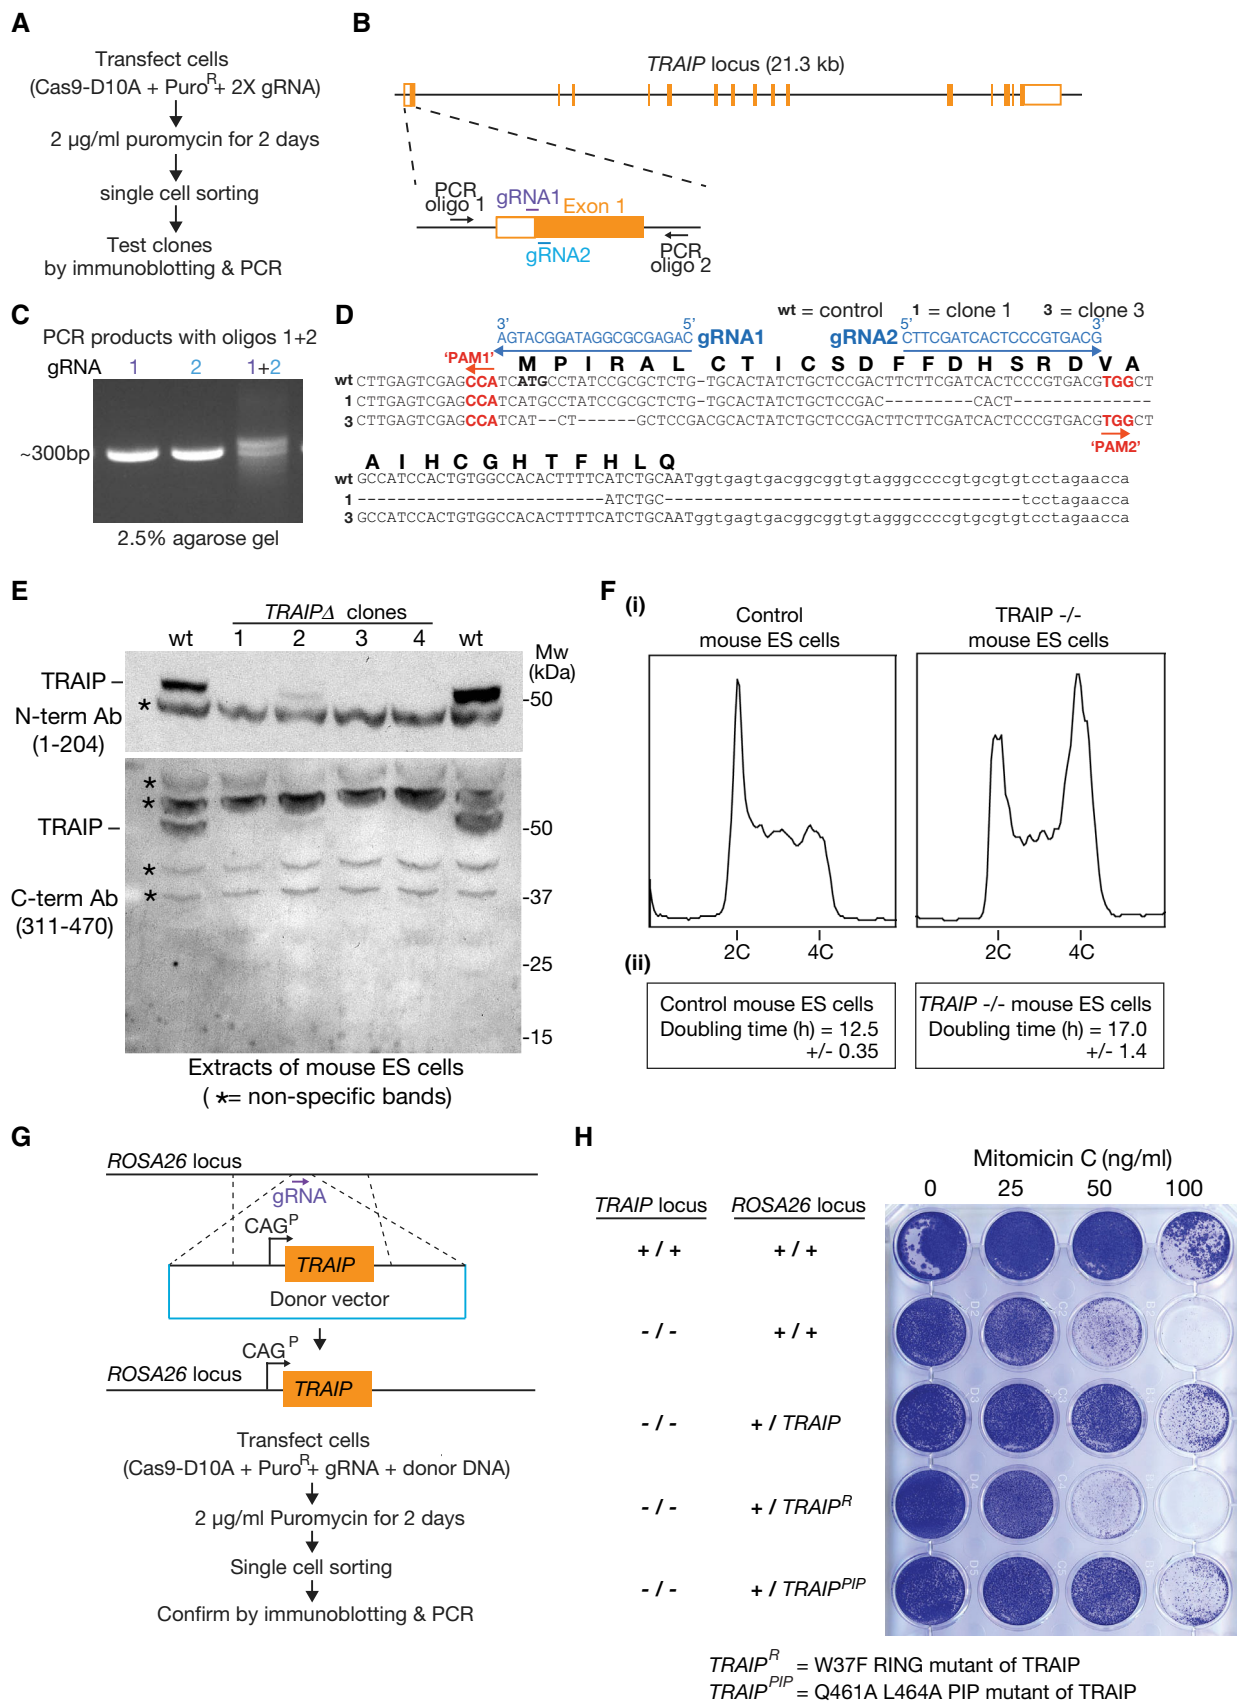

Figure EV4.

**Figure EV5. Models for disassembly of the metazoan replisome. The figure summarises data from this manuscript together with previous studies with early embryos of *Caenorhabditis elegans* and extracts of *Xenopus laevis* eggs.**

- A During DNA replication termination, CUL2<sup>LRR1</sup> promotes ubiquitylation of CMG-MCM7, leading to disassembly by p97-UFD1-NPL4.
- B In cells that lack CUL2<sup>LRR1</sup> activity, the CMG replisome remains on chromatin after DNA replication termination. Upon entry into mitosis, the TRAIPI ubiquitin ligase activates a second pathway of CMG disassembly, dependent upon p97.
- C Previous work showed that TRAIPI is required in human cells to process sites of incomplete DNA replication during mitosis, by a process of Mitotic DNA Synthesis or "MiDAS" (Sonneville et al, 2019). It is likely that the first step in this pathway is TRAIPI-dependent CMG disassembly upon entry into mitosis.

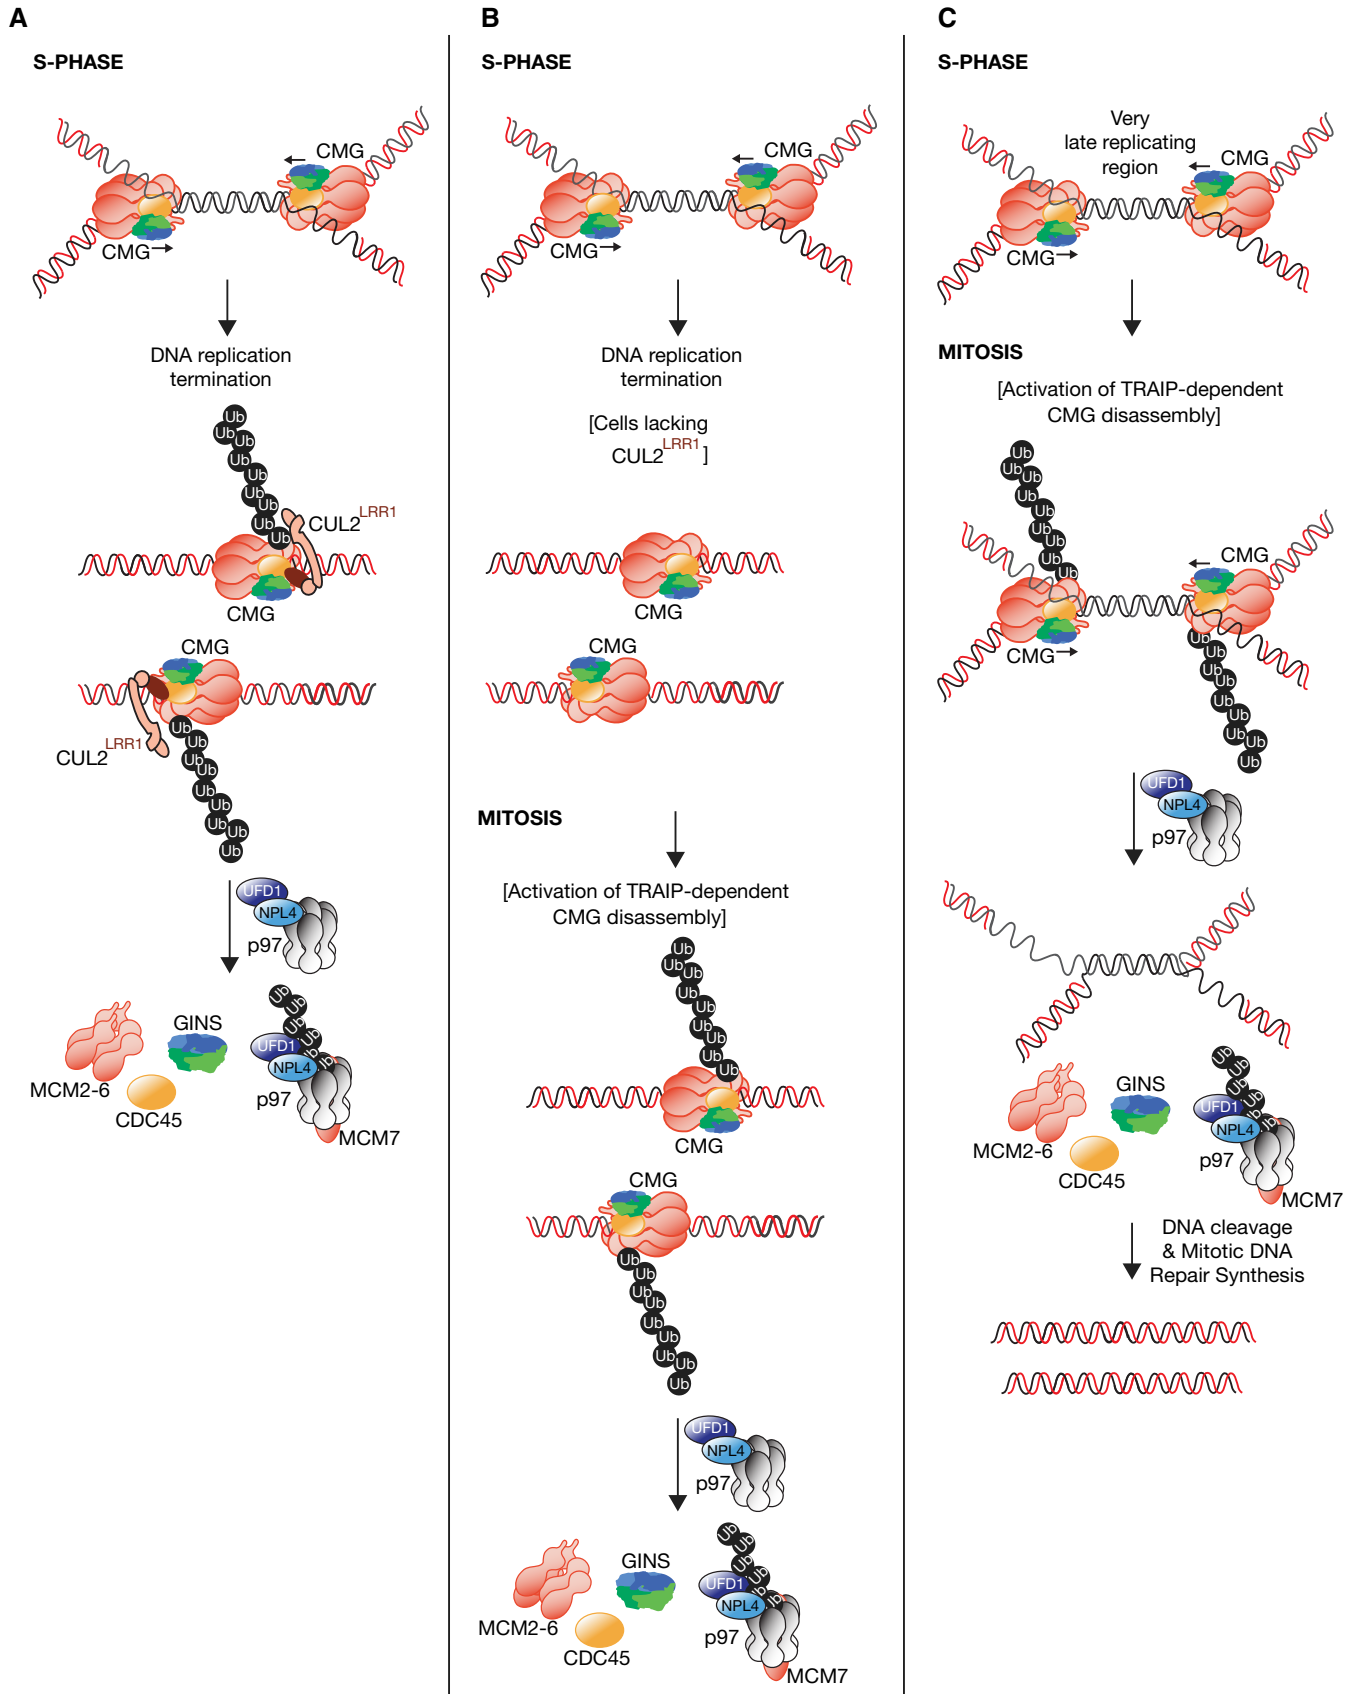

Figure EV5.
