# Supplementary material for: CUL2LRR1, TRAIP and p97 control CMG helicase disassembly in the mammalian cell cycle
Source: PubMed Central journal article supplement (PMC7926238; doi:10.15252/embr.202052164), 2021-02-15
Supplement: EMBR-22-e52164-s004.pdf [file EMBR-22-e52164-s004.pdf]

# CUL2<sup>LRR1</sup>, TRAIIP and p97 control CMG helicase disassembly in the mammalian cell cycle

Fabrizio Villa, Ryo Fujisawa, Johanna Ainsworth, Kohei Nishimura, Michael Lie-A-Ling, Georges Lacaud, and Karim Labib

DOI: [10.15252/embr.202052164](https://doi.org/10.15252/embr.202052164)

Corresponding author(s): Karim Labib ([kpmlabib@dundee.ac.uk](mailto:kpmlabib@dundee.ac.uk))

---

|                         |                               |             |
|-------------------------|-------------------------------|-------------|
| <b>Review Timeline:</b> | Transfer from Review Commons: | 24th Nov 20 |
|                         | Editorial Decision:           | 7th Dec 20  |
|                         | Revision Received:            | 16th Dec 20 |
|                         | Accepted:                     | 7th Jan 21  |

---

Editor: Esther Schnapp

The logo for Review Commons, with the word "Review" in a large, blue, italicized serif font and the word "COMMONS" in a smaller, blue, uppercase sans-serif font below it.

**Transaction Report: This manuscript was transferred to EMBO Reports following peer review at Review Commons**

(Note: With the exception of the correction of typographical or spelling errors that could be a source of ambiguity, letters and reports are not edited. Depending on transfer agreements, referee reports obtained elsewhere may or may not be included in this compilation. Referee reports are anonymous unless the Referee chooses to sign their reports.)

1 **RESPONSE TO REVIEWERS:**

2 We are grateful to the three reviewers for their comments and helpful  
3 suggestions. All three reviewers were united in thinking that our experiments were  
4 **“of impeccable technical quality”** and felt **“that the manuscript is publishable**  
5 **without or with only minor revisions”**, since the **“main conclusions are**  
6 **sufficiently supported by experimental evidence”**.

7 In order to address all of the points that were raised by the reviewers, we  
8 have now submitted a revised manuscript that includes:

- 9
- 10 - a considerable amount of new data (Figure 2C, Figure 4C, Figure EV1, Figure
  - 11 EV4F, Appendix Figure 1, Appendix Figure 2, Appendix Figure 3)
  - 12 - new Figures (Figure EV5)
  - 13 - a substantial revision of the text to address all of the points that were raised.
  - 14 - rearrangement of previous figures (largely in response to the single major point that
  - 15 was raised by Reviewer 1). Therefore, the revised manuscript now has 5 main
  - 16 figures, 5 ‘Extended View’ figures, 3 ‘Appendix Supplementary Figures’ and 1
  - 17 Appendix Supplementary Table.

18

19 For all these reasons, we hope that you will agree that our revised manuscript  
20 is now ready for publication.

21

22 **1. SUMMARY OF REVIEWERS’ COMMENTS:**

23

24 **Reviewer 1:**

25 **The reviewer noted “the authors address a timely and very focused**  
26 **research question in connection with the disassembly of the replisome.” “The**  
27 **authors of the present study elegantly and convincingly transfer the insight**  
28 **gained in other model systems to mammals and, thus, show that the**  
29 **Cul2\_LRR1 and TRAIIP pathways are required for CMG disassembly in**  
30 **mammalian cells.”**

31 **“The established method for CMG isolation could indeed be of high**  
32 **value to characterise the mammalian replisome and its fate in diverse**  
33 **conditions that involve, for example, replisome stalling, similarly to an**  
34 **equivalent method the lab developed using budding yeast, and has used for**  
35 **years to gain insight into the structure, dynamics and working principles of the**  
36 **eukaryotic replisome”**

37

38 **Reviewer 2**

39 **“the introduction of mouse ES cells as a tractable system accompanied by**  
40 **gene editing method in order to study mammalian replisomes in spontaneous**  
41 **and drug-treated conditions will be the major contribution since it can be a**  
42 **valuable took kit to the future research in studying replisomes in mammalian**  
43 **cells. I believe this manuscript be publishable in your journal after some minor**  
44 **revisions.”**

45

46 **Reviewer 3:**

47 **“The methods developed here with mESCs also open the road for future**  
48 **analyses of the different proteins involved in this process.”**

49

50 **2. DETAILED REPLY TO REVIEWERS’ COMMENTS**

51 In the following discussion, please note that references to page and line  
52 numbers correspond to the revised manuscript that we have submitted with tracked  
53 changes. We have also submitted a further 'Related Manuscript File' containing the  
54 revised version of all the figures and supplementary information.  
55

## 56 REVIEWER 1

### 57 Major comments:

58 The reviewer summarised her / his view as follows: ***"The experiments  
59 presented are of impeccable technical quality. The main conclusions are  
60 sufficiently supported by experimental evidence. The research is presented in  
61 an appropriate and balanced way."***

62  
63 and then raised one main point:

64 ***"The use of mouse ES cells for the presented study needs further discussion  
65 and, perhaps, some development. The authors state that ES cells are perfectly  
66 suitable for isolating CMG, because 60 % of each population are in S phase. I  
67 agree that this might help, but more conventional lines have not much fewer  
68 cells in S phase. Mouse ES cells are difficult to cultivate and manipulate in  
69 high quantities on feeder cells or on gelatine with LIF in a way that they stably  
70 retain pluripotency. However, the particular advantages of ES cells are not  
71 discussed in the manuscript. Do the authors want to explore any of these  
72 advantages? For example, do they want to specifically investigate how  
73 replication forks in cells with embryonic cell cycles behave? Or do they want  
74 to investigate how replisomes change during differentiation? Because the  
75 authors make a point that the development of the experimental system of CMG  
76 isolation is part of the scientific progress presented in the manuscript, a better  
77 discussion of the matter is required. If specific attributes of ES cells are indeed  
78 important, like pluripotency, differentiation capacity, stem cell-ness or  
79 embryonic cell cycle and replication profiles the authors should characterise  
80 whether the developed ES cell line serves the purpose."***

81 E14TG2a mouse ES cells have a stable diploid karyotype, in common with  
82 stable diploid human cell lines such as RPE1. In practice, however, it is much  
83 easier to isolate the CMG helicase from mouse ES cells, for multiple reasons:  
84

85 - previous studies indicated that around 70% of asynchronously growing mouse ES  
86 cells are in S-phase (Ter Huurne et al, now cited on lines 200-201), compared to  
87 about 25-35% of human RPE1 cells (Matson et al, 2017, cited on lines 202-203).  
88 Since this is an important point, we performed flow cytometry and EdU labelling of  
89 E14TG2a mouse ES cells and human RPE1 cells grown in parallel with each other,  
90 and found that the mouse ES cells had 72% S-phase cells, compared to 37% in  
91 human RPE1 cells (the new data are now shown in Appendix Figure S1 and are  
92 discussed between lines 200-202).  
93

94 - mouse ES cells grow very rapidly, with a doubling time of 12.5 hour (Figure EV4F),  
95 compared to a doubling time of over 20 hours for human RPE1 cells (Matson et al,  
96 2017, cited on lines 208-209).  
97

98 - mouse ES cells are smaller than somatic cells such as RPE1 cells and lack contact  
99 inhibition (discussed in Burdon et al, 2002, which we now cite on line 206). For

100 these reasons, mouse ES cells can be grown at much higher densities per plate than  
101 human RPE1 cells.

102

103 The reviewer was also concerned that mouse ES cells are difficult to cultivate,  
104 but in reality the E14TG2a mouse ES cells used in our study are extremely easy to  
105 grow and maintain in the absence of feeder cells, according to the protocols  
106 described in Materials and Methods (we now note this point at the start of Results on  
107 line 191-192).

108

109 Furthermore, mouse ES cells have large sub-nuclear bodies of constitutive  
110 heterochromatin (Saksouk et al, 2015), which enabled us to develop a new in situ  
111 method for monitoring microscopically the presence of the CMG-replisome on  
112 replicating chromatin in live cells. We now note this point in Results on lines 210-  
113 213.

114

115 In addition, genome editing in mouse ES cells is even easier than in human  
116 diploid cell lines, allowing us to generate knockin lines without needing to insert a  
117 marker gene into the modified locus (e.g. data now in Figure 1, with the details  
118 described in Materials and Methods).

119

120 For all these reasons, E14TG2a mouse ES cells provide an ideal model  
121 system with which to isolate the mammalian CMG helicase and study its regulation.

122

123 **Minor points to address:**

124 1. ***“Establishment of CMG isolation:***

125 ***S phase specific, DNA-dependent Cdc45 and Mcm2-7 co-purification with Sld5***  
126 ***is very strong evidence that CMGs from replisomes are isolated.***

127 ***However, the proteins involved might form diverse protein complexes, which***  
128 ***makes the simple statement that CMG is isolated difficult. Showing***

129 ***dependency on replication initiation, for example by RNAi against origin***

130 ***licensing or firing factors (Cdc6, Cdt1, Treslin/TICRR, MTBP) would***

131 ***complement the experiments shown. Alternatively, co-purification of other***

132 ***replisome components could be tested. Pol epsilon is shown, but, as an origin***  
133 ***firing factor, may not only interact with mature CMGs.***

134 ***IP showing other replisome proteins”***

135 We agree with the reviewer that the S-phase specific and DNA-dependent co-

136 purification of SLD5 with all of the other 10 subunits of the CMG helicase (e.g.

137 Figures 1-2) provides very strong evidence that we are indeed isolating the CMG

138 helicase in our experiments.

139

140 We now present additional new data in Figure EV1, to confirm that the purified

141 material also contains the CMG partners TIMELESS-TIPIN, CTF4 and CLASPIN,

142 together with Pol alpha (POLA1), complementing data in Figure 5A that show co-

143 purification with Pol epsilon (POLE1).

144

145 These data strongly indicate that E14TG2a mouse ES cells provide a

146 powerful model system with which to isolate and characterise the mammalian CMG-

147 replisome.

148

149 2: ***"GFP-Sld5 microscopy:***  
150 ***The authors take co-localisation of Sld5 with PCNA in heterochromatic regions***  
151 ***as evidence that the Sld5 signal represents CMG in replisomes. I agree that***  
152 ***this is highly suggestive. Additional evidence that other replisome***  
153 ***components are also present erases almost all doubts. Because presented are***  
154 ***mere correlations, active manipulation of replisomes to preserve them on***  
155 ***heterochromatin that should therefore prevent termination and Sld5 unloading***  
156 ***could complement these correlations. Such a treatment could be replisome***  
157 ***stalling by high concentrations of aphidicolin or HU (perhaps in combination***  
158 ***with DDK inhibition to prevent dormant origin firing)."***

159 The reviewer notes that the colocalization of SLD5 with PCNA in  
160 heterochromatic regions ***"is highly suggestive"*** of the presence on chromatin of the  
161 CMG helicase at such sites. Moreover, ***"additional evidence that other replisome***  
162 ***components are also present erases almost all doubts"***.

163

164 Nevertheless, the reviewer suggested that the correlative data could be  
165 complemented by ***"active manipulation of replisomes to preserve them on***  
166 ***heterochromatin"***.

167 In fact, our manuscript already contained such data, in the experiments where  
168 we blocked replisome disassembly during S-phase by inhibition of p97 (data now in  
169 Figure 2D-E) or by inhibition of CUL2-LRR1 (data now in Figure 3D-E and Figure  
170 4A). In contrast, treating cells with aphidicolin or HU would have blocked late origin  
171 firing via the S-phase checkpoint and so would not have been suitable for examining  
172 the replisome on late-replicating heterochromatin.

173 Most importantly, the data now in Figure EV3E show that GFP-SLD5 and  
174 mCherry-PCNA arrive at heterochromatin patches with the same kinetics in cells  
175 treated with p97 inhibitor (Figure EV3E, top cell, compare t-18 and t0), but mCherry-  
176 PCNA then disappears quickly as in untreated cells, whereas GFP-SLD5 remains on  
177 chromatin. These data reflect the essential role of p97 in CMG helicase disassembly  
178 during DNA replication termination and provide strong evidence to confirm that the  
179 GFP-SLD5 signal on chromatin represents CMG in replisomes.

180

181 3. ***"Fig 1:***

182 ***It is believably shown that p97i results in ubiquitylation of Mcm7 in CMG***  
183 ***isolations and suppression of CMG extraction in heterochromatic regions.***

184 ***- The fact that Mcm7 present in CMGs is ubiquitylated in response to p97i, and***  
185 ***in light of what we know about disassembly of CMG in Xenopus, suggest that***  
186 ***ubiquitylation occurs specifically on CMGs. However, p97i could theoretically***  
187 ***also lead to ubiquitylation of pre-RCs or soluble Mcm7. Testing bulk chromatin***  
188 ***from G1 and S phase cells and soluble Mcm7 could complement the***  
189 ***experiments shown."***

190 The data in our manuscript show that 'soluble MCM7' is not detectably  
191 ubiquitylated upon treatment of cells with p97 inhibitor, in contrast to the small  
192 fraction of MCM7 in the CMG helicase (e.g. data now in Figure 2A, top panels:  
193 compare free MCM7 in lane 3 with CMG-MCM7 in lane 6).

194 Although we agree with the reviewer that it would be interesting to explore  
195 whether pre-RCs are ubiquitylated upon inhibition of p97, our manuscript is focussed  
196 on the regulation of the CMG helicase, so that point remains beyond the remit of our  
197 study.

198



199 - ***“Fig 1D: The image shown for mES cells (control) looks like it has a different***  
200 ***signal-to-noise ratio than the other images of this panel. The same is true for***  
201 ***at least one more figure, 2D. Can the authors comment whether all images***  
202 ***were captured and processed equally or, if not, give the details and explain?”***

203 We have now reprocessed the relevant data previously in Figure 1D and  
204 Figure 2D (now 2D and 3D), and have adjusted the text in Materials and Methods  
205 (lines 709-710) to confirm that ***“For all samples in a particular experiment, the***  
206 ***conditions for image capture were identical and the data were processed in the***  
207 ***same way.”***

208  
209 - ***“Fig 1D: A more complete way of data quantification should be used to go***  
210 ***with this figure. In the text the authors write from line 200: “After treatment for***  
211 ***3 hours, around half the cells contained heterochromatin patches with GFP-***  
212 ***Sld5”...***

213 ***What is the percentage without p97i or at 0 h?”***

214 As discussed on line 273, we have now quantified the percentage of  
215 untreated cells that have PCNA / GFP-SLD5 on heterochromatic patches (14 %).

216 As illustrated in Figure 2C-D (previously Figure 1C-D), and discussed on lines  
217 279-281, the heterochromatin patches of SLD5 are brighter after inhibition of p97.  
218 This is likely due to the accumulation of ubiquitylated CMG on chromatin after DNA  
219 replication termination, in the many replicons within each heterochromatin patch.

220

221 ***“Are half the cells in late S at this point in time or do Sld5-positive***  
222 ***heterochromatic regions accumulate over time because CMGs are not***  
223 ***unloaded (which could be expected)?”***

224 The data in Figure EV3E (previously Figure S4E) show that mCherry-PCNA  
225 associates transiently with heterochromatic patches in cells treated with p97i, just  
226 like in control cells. GFP-SLD5 arrives on heterochromatin patches with the same  
227 kinetics as mCherry-PCNA in cells treated with p97 inhibitor (Figure S3E, top cell,  
228 compare t-18 and t0), but GFP-SLD5 remains on chromatin after the disappearance  
229 of mCherry-PCNA. Therefore, these data indicate that the accumulation of cells with  
230 GFP-SLD5 on heterochromatin reflects the fact that CMG is not unloaded during  
231 DNA replication termination, in cells that lack p97 activity.

232

233 4. ***“Fig 2:***

234 ***The conclusion that Cul2\_LRR1 is required for Mcm7 ubiquitylation and to***  
235 ***remove CMG from heterochromatin is largely convincing.***

236 - ***Fig2B/C: A second siRNA against LRR (or a rescue with siRNA-resistant***  
237 ***LRR1) should be shown to exclude off-target effects.”***

238 New data in Appendix Figure S2 show that two different siRNA to LRR1  
239 produce a comparable defect in CMG-MCM7 ubiquitylation. These data are now  
240 discussed on lines 321-322.

241

242 ***“Fig 2D/E: It seems that the authors use LRR1 siRNA + MLN4924 to inactivate***  
243 ***Cul2-LRR1. Please comment on whether individual treatments were not***  
244 ***effective enough or whether there is another reason.”***

245 The data now in Figure EV2B (previously Figure S3B) show that the  
246 combination of MLN4924 and LRR1 siRNA produces a tighter block to CMG-MCM7  
247 ubiquitylation than either individual treatment. MLN4924 inhibits the E1 enzyme for  
248 neddylation and should in theory inhibit all cullin ligases. Since the phenotype of

249 MLN4924 is made tighter by LRR1 siRNA, this indicates that both of the individual  
250 treatments are a bit leaky.

251 Correspondingly, the accumulation of replisome proteins on heterochromatin  
252 patches in Figure 3D-E (previously Figure 2D-E) was dependent upon the combined  
253 treatment of cells with MLN4924 and LRR1 siRNA. This is now explained in the  
254 legend to Figure 3 (lines 2750-2755).

255

256 5. **"Fig 3:**

257 - **3A: This experiment seems to be missing a comparison with PCNA and Sld5**  
258 **dynamics in untreated cells. A time lapse experiment with untreated cells is**  
259 **shown in 1C. It seems to indicate that PCNA and Sld5 leave heterochromatin**  
260 **without a delay. However, without a common reference time point (common 0**  
261 **min time point) and without similar time points shown comparison is difficult.**  
262 **For example, the authors could make a statement about whether there is a**  
263 **delay between PCNA and Sld5 and how big it is."**

264 Careful analysis of time-lapse data (an example is provided in Figure 2C,  
265 previously Figure 1C) shows that there is no delay between the arrival on  
266 heterochromatin patches of mCherry-PCNA and GFP-SLD5. Moreover, the two  
267 proteins disappear from heterochromatin patches with identical kinetics.

268 The revised text now makes this clear (lines 272-275), by saying that "**GFP-**  
269 **SLD5 was readily detected on heterochromatic patches during late S-phase**  
270 **(14% asynchronous cells, n = 238), appearing and disappearing with similar**  
271 **kinetics to mCherry-PCNA (100% cells, n = 101; an example is shown in Figure**  
272 **2C)."**

273

274 - **"3B: The authors should show that there is no Sld5 on mitotic chromosomes**  
275 **in cells without Cul2 inhibition. This is required to unequivocally show that the**  
276 **Sld5 signals seen on mitotic chromosomes are from CMGs not unloaded in the**  
277 **previous S phase. In Fig 4 the authors show this for TRAI<sup>-/-</sup> cells. A reference**  
278 **to this fact may suffice."**

279 The revised text now makes clear on lines 347-349 that GFP-SLD5 is never  
280 observed on mitotic chromatin in untreated cells. Moreover, examples of untreated  
281 cells entering mitosis are shown in Figure 4C.

282

283 6. **"Fig 4: - 4C/D:**

284 **I do not think the authors state in the main text, legend or methods how they**  
285 **complemented the cells. By transient transfections, random integration, using**  
286 **plasmids or BACs?"**

287 Sorry about that – this was actually explained in Figure S5F (now Figure  
288 EV4G), but for greater clarity, the relevant details have now been added to the  
289 legend to Figure 5C (lines 2787-2788) and also to the appropriate section of  
290 Materials and Methods (lines 541-550). Plasmids expressing TRAI<sup>-/-</sup> from the CAG  
291 promoter were integrated at the ROSA26 locus via CRISPR-Cas9 genome editing.

292

293 7. **"line 266:**

294 **"38 % cells had GFP-Sld5..." on heterochromatin upon Cul2\_LRR1 inhibition in**  
295 **TRAI<sup>-/-</sup> cells. This seems little compared to WT cells. Here again, a clearer**  
296 **way to represent quantifications would help compare data."**

297 The data in Figure EV4F illustrate that TRAI<sup>-/-</sup> cells grow more slowly than  
298 wild type cells (doubling time of ~17 hours compared to 12.5 hours). This likely

299 explains the slightly lower proportion of cells that accumulate GFP-SLD5 on  
300 heterochromatin patches, following transient inhibition of CUL2-LRR1 (discussed  
301 now on lines 376-378).

302

## 303 REVIEWER 2

304 The reviewer summarised her / his view as follows: *“the authors present the*  
305 *first demonstration on the existence of two regulatory pathways and on the*  
306 *role of p97 ATPase in the disassembly of the mammalian replisome. In*  
307 *addition, they reveal mouse ES cells as tractable model system for studying*  
308 *the disassembly of mammalian replisome. And the data in this study are very*  
309 *clear and the manuscript is well-organized and well-written to easily follow.”*  
310 *“To my point of view, the introduction of mouse ES cells as a tractable system*  
311 *accompanied by gene editing method in order to study mammalian replisomes*  
312 *in spontaneous and drug-treated conditions will be the major contribution*  
313 *since it can be a valuable tool kit to the future research in studying replisomes*  
314 *in mammalian cells. I believe this manuscript be publishable in your journal*  
315 *after some minor revisions.”*

316 *“These findings will contribute to significant advances on our understanding*  
317 *of mammalian DNA replication processes, including CMG disassembly.”*

318

### 319 Minor points to address:

320 1. *“Presenting a descriptive model on CMG disassembly in mammalian cells*  
321 *will be helpful for general readers in following the manuscript.”*

322 Models for CMG disassembly in mammalian cells during DNA replication  
323 termination (A) and during mitosis (B-C) are now shown in Figure EV5.

324

325 2. *“Even though statistics are depicted in the method section, it would be*  
326 *better to also describe statistics in more details (p values, SD, S.E.M. and so*  
327 *on) in figure legends if applicable.”*

328 Details of statistics have now been included where applicable in the figure  
329 legends of the revised manuscript (legend to Figure 5D, previously Figure 4D and  
330 legend to Figure EV4, previously Figure S5).

331

332 3. *“In figure 2C, please add (-) in the last panel on the top.”*

333 Thank you – we have now corrected this error in Figure 3C (formerly Figure 2C).

334

335 4. *“Is it possible to show colored images instead of black/white images? If*  
336 *possible, it should be better to show colored images.”*

337 It is generally accepted that single-channel images should be presented in  
338 grayscale (e.g. Johnson, J., *Mol. Biol. Cell*, 2012, 23, 754-757). This is the  
339 convention that we have followed. In addition, however, we have now included a  
340 pseudocolour merge for Figure 2C.

341

342 For greater clarity and to provide visual guides to the reader, we have also  
343 changed the colour of all the labels in each panel of the Figures containing  
344 microscopy data, so that the text ‘GFP-SLD5’ is coloured green, mCherry-PCNA is  
345 coloured red, etc.

346

347 5. *“Please, describe how to generate stable cells expressing mCherry-H2B and*  
348 *mCherry-PCNA in mES cells in the method section.”*



349 mCherry-H2B was expressed from the CAG promoter at the ROSA26 locus.  
350 Details are now provided in the legend to Figure 4B (lines 2783-2784) and in  
351 Materials and Methods (lines 542-550).

352 mCherry-PCNA was expressed from the CMV promoter, via random  
353 integration of a linearised plasmid (pcDNA3.1-mCherry-PCNA, see Appendix Table  
354 S1) that also contained a kanamycin / G418 resistance gene. Transfected cells were  
355 selected for 9 days with medium containing 300 µg / ml G418, before single-cell  
356 sorting via flow cytometry. Stable clones were then monitored by immunoblotting  
357 and spinning disk confocal microscopy. Details are provided in Materials and  
358 Methods (lines 561-568).

### 359 REVIEWER 3

361 **The reviewer summarised her / his view as follows: “The cellular system**  
362 **described in this study is well designed and yields clear results: using**  
363 **CRISPR/Cas9, the authors have introduced TAP or GFP tags in SLD5, a**  
364 **component of CMG, without disrupting the endogenous regulation of SLD5**  
365 **gene expression. Then, chromatin association/ and dissociation of the CMG**  
366 **complex is monitored through confocal microscopy analysis of SLD5 at dense,**  
367 **heterochromatic DNA regions that are replicated in late S phase. The**  
368 **biochemistry experiments showing the integrity of the CMG complex and/or**  
369 **MCM7 ubiquitylation in different experimental conditions (e.g. Fig. 1A, Fig. 2A-**  
370 **C, Figs. S2 and S3) are flawless.**

371  
372 **In my opinion, the results strongly support the conclusions of the paper. While**  
373 **a role of CUL2-LRR1 and TRAIIP ubiquitylation pathways in CMG disassembly**  
374 **could possibly be anticipated from the previous work in model systems, it is**  
375 **nicely demonstrated here with convincing data.”**

376  
377 **“I do not have any major criticism about experimental design or execution.”**

378  
379 **“The methods developed here with mESCs also open the road for future**  
380 **analyses of the different proteins involved in this process.**

381  
382 **The discussion could benefit from some additional speculation about the**  
383 **relative strength/reliability of the CUL2-LRR1 vs TRAIIP pathways, why this**  
384 **dual system is evolutionary conserved, etc.”**

385 We have added an additional figure to the revised manuscript (Figure EV5)  
386 with models to illustrate the proposed roles of CUL2<sup>LRR1</sup> and TRAIIP in the  
387 mammalian cell cycle. These are discussed between lines 410-418, making clear  
388 that CUL2<sup>LRR1</sup> mediates CMG disassembly during DNA replication termination,  
389 whereas TRAIIP-dependent CMG disassembly during mitosis is likely to have  
390 evolved to allow metazoan cells with large genomes to process unreplicated DNA  
391 during mitosis, in order to allow the completion of nuclear division.

392  
393 **“My only other comment is that a recent study from the Walter laboratory (Wu**  
394 **et al, 2019, Nature) has reported the role of Xenopus TRAIIP and p97 in CMG**  
395 **ubiquitylation and eviction in the context of fork convergence at DNA inter-**  
396 **strand crosslinks. This biological context shares many similarities with**  
397 **replication termination events, and I feel that this study should be referenced**  
398 **and discussed.”**

399 We now include discussion of this point on lines 441-444 and cite the paper  
400 by Wu et al.

Dear Karim,

Thank you for the transfer of your revised manuscript. We have now received the enclosed report from referee 1, who was asked to assess it. This referee still has minor suggestions that I would like you to incorporate before we can proceed with the official acceptance of your manuscript.

A few editorial changes are also required:

- The reference format lists more than 10 authors, please correct. A maximum of 10 authors before "et al" should be listed.
- Please send us a completed author checklist that can be found here: <https://www.embopress.org/page/journal/14693178/authorguide>. The checklist will also be part of the transparent peer-review process file (RPF).
- Please upload all figures as individual files.
- Fig 2A is called out before Fig 1H. Fig 5A is called out after 5D. Appendix Figs S1+S2 panels are not called out. Please correct.
- Please upload the Appendix as a separate pdf file with a table of content and page numbers. The Appendix table needs to be called Appendix Table S1.
- Fig 1J seems to contain a splice. Please send us the source data for this figure panel.

I attach to this email a related manuscript file with comments by our data editors. Please address all comments in the final manuscript.

EMBO press papers are accompanied online by A) a short (1-2 sentences) summary of the findings and their significance, B) 2-3 bullet points highlighting key results and C) a synopsis image that is exactly 550 pixels wide and 200-600 pixels high (the height is variable). You can either show a model or key data in the synopsis image. Please note that text needs to be readable at the final size. Please send us this information along with the revised manuscript.

I look forward to seeing a final version of your manuscript as soon as possible.

Best regards,  
Esther

Esther Schnapp, PhD  
Senior Editor  
EMBO reports

Referee #1:

The revision of the manuscript "CUL2LRR1, TRAIIP and p97 control CMG helicase disassembly in

the mammalian cell cycle" largely erased the few concerns raised regarding the original manuscript version. The data is clear and convincing and supports the conclusions presented. I fully support publication of the manuscript.

Two minor points could be addressed:

1) Quantification of microscopy images (typically % cells) are currently presented in the main text in brackets. This makes it difficult to compare numbers within an experiment and between experiments, as I stated in my first review. The authors should indicate the numbers in the figures, either as graphs or numbers in the images shown.

2) In line 236, the conclusion is presented that the observation that CMG remains on chromatin in the presence of p97i indicates that p97 is required for CMG disassembly during termination. Although this is likely, an alternative explanation is that replisomes stall upon p97 inhibition and the termination stage is never reached. If the authors do not disagree with this possibility they should mention this alternative explanation, perhaps also saying why it is less likely. I apologise that I did not raise this point in my first review.

1 **RESPONSE TO REFEREE COMMENTS:**

2

3 The referee raised two final points:

4

5 1. ***“Quantification of microscopy images (typically % cells) are currently***  
6 ***presented in the main text in brackets. This makes it difficult to compare***  
7 ***numbers within an experiment and between experiments, as I stated in my first***  
8 ***review. The authors should indicate the numbers in the figures, either as***  
9 ***graphs or numbers in the images shown.”***

10

11 Quantification has now largely been moved from main text to the Figures and Figure  
12 legends (in many cases the latter makes sense for clarity and due to space  
13 limitations in the Figure panels).

14

15

16 2. ***“In line 236, the conclusion is presented that the observation that CMG***  
17 ***remains on chromatin in the presence of p97i indicates that p97 is required for***  
18 ***CMG disassembly during termination. Although this is likely, an alternative***  
19 ***explanation is that replisomes stall upon p97 inhibition and the termination***  
20 ***stage is never reached. If the authors do not disagree with this possibility they***  
21 ***should mention this alternative explanation, perhaps also saying why it is less***  
22 ***likely. I apologise that I did not raise this point in my first review.”***

23

24 The data argue strongly that p97 inhibition leads to persistence of ubiquitylated CMG  
25 helicase on chromatin, reflecting the role of p97 in disassembly of ubiquitylated  
26 CMG. We do not agree that the data are consistent with replisome stalling, for two  
27 main reasons.

28 - firstly, Figure 2A shows that p97 inhibition leads to the accumulation of CMG with  
29 ubiquitylated MCM7 subunit. Ubiquitylation occurs specifically during DNA  
30 replication termination, not during replisome stalling.

31 - secondly, time-lapse data in Figure EV3 shows that mCherry-PCNA still associates  
32 transiently with heterochromatic patches in late S-phase upon inhibition of p97,  
33 indicating that replication kinetics are indistinguishable from the control (no evidence  
34 of stalling). In contrast to PCNA (marker of ongoing DNA synthesis), GFP-SLD5 and  
35 other core-replisome factors remain on chromatin subsequently (indicating  
36 persistence of the replisome complex, but not stalling of DNA synthesis).

37 Considering together the above two points, the most reasonable conclusion is that  
38 p97 inhibition leads to the persistence of ubiquitylated CMG helicase on chromatin  
39 after DNA replication termination. Therefore, we have not adjusted the relevant  
40 section of the text (lines 186-192 and 225-232).



Karim Labib  
University of Dundee  
MRC Protein Phosphorylation and Ubiquitylation Unit  
Sir James Black Centre  
Dow Street  
Dundee DD1 5EH  
United Kingdom

Dear Karim,

I am very pleased to accept your manuscript for publication in the next available issue of EMBO reports. Thank you for your contribution to our journal.

At the end of this email I include important information about how to proceed. Please ensure that you take the time to read the information and complete and return the necessary forms to allow us to publish your manuscript as quickly as possible.

As part of the EMBO publication's Transparent Editorial Process, EMBO reports publishes online a Review Process File to accompany accepted manuscripts. As you are aware, this File will be published in conjunction with your paper and will include the referee reports, your point-by-point response and all pertinent correspondence relating to the manuscript.

If you do NOT want this File to be published, please inform the editorial office within 2 days, if you have not done so already, otherwise the File will be published by default [contact: emboreports@embo.org]. If you do opt out, the Review Process File link will point to the following statement: "No Review Process File is available with this article, as the authors have chosen not to make the review process public in this case."

Should you be planning a Press Release on your article, please get in contact with emboreports@wiley.com as early as possible, in order to coordinate publication and release dates.

Thank you again for your contribution to EMBO reports and congratulations on a successful publication. Please consider us again in the future for your most exciting work.

Best wishes,  
Esther

Esther Schnapp, PhD  
Senior Editor  
EMBO reports

\*\*\*\*\*

THINGS TO DO NOW:

You will receive proofs by e-mail approximately 2-3 weeks after all relevant files have been sent to our Production Office; you should return your corrections within 2 days of receiving the proofs.

Please inform us if there is likely to be any difficulty in reaching you at the above address at that time. Failure to meet our deadlines may result in a delay of publication, or publication without your corrections.

All further communications concerning your paper should quote reference number EMBOR-2020-52164V2 and be addressed to [emboreports@wiley.com](mailto:emboreports@wiley.com).

Should you be planning a Press Release on your article, please get in contact with [emboreports@wiley.com](mailto:emboreports@wiley.com) as early as possible, in order to coordinate publication and release dates.

**YOU MUST COMPLETE ALL CELLS WITH A PINK BACKGROUND** ↓

PLEASE NOTE THAT THIS CHECKLIST WILL BE PUBLISHED ALONGSIDE YOUR PAPER

Corresponding Author Name: KARIM LABIB

Journal Submitted to: EMBO REPORTS

Manuscript Number: EMBOR-2020-52164V1

### Reporting Checklist For Life Sciences Articles (Rev. June 2017)

This checklist is used to ensure good reporting standards and to improve the reproducibility of published results. These guidelines are consistent with the Principles and Guidelines for Reporting Preclinical Research issued by the NIH in 2014. Please follow the journal's authorship guidelines in preparing your manuscript.

#### A- Figures

##### 1. Data

The data shown in figures should satisfy the following conditions:

- the data were obtained and processed according to the field's best practice and are presented to reflect the results of the experiments in an accurate and unbiased manner.
- figure panels include only data points, measurements or observations that can be compared to each other in a scientifically meaningful way.
- graphs include clearly labeled error bars for independent experiments and sample sizes. Unless justified, error bars should not be shown for technical replicates.
- if  $n < 5$ , the individual data points from each experiment should be plotted and any statistical test employed should be justified.
- Source Data should be included to report the data underlying graphs. Please follow the guidelines set out in the author ship guidelines on Data Presentation.

##### 2. Captions

Each figure caption should contain the following information, for each panel where they are relevant:

- a specification of the experimental system investigated (eg cell line, species name).
- the assay(s) and method(s) used to carry out the reported observations and measurements
- an explicit mention of the biological and chemical entity(ies) that are being measured.
- an explicit mention of the biological and chemical entity(ies) that are altered/varied/perturbed in a controlled manner.
- the exact sample size (n) for each experimental group/condition, given as a number, not a range;
- a description of the sample collection allowing the reader to understand whether the samples represent technical or biological replicates (including how many animals, litters, cultures, etc.).
- a statement of how many times the experiment shown was independently replicated in the laboratory.
- definitions of statistical methods and measures:
  - common tests, such as t-test (please specify whether paired vs. unpaired), simple  $\chi^2$  tests, Wilcoxon and Mann-Whitney tests, can be unambiguously identified by name only, but more complex techniques should be described in the methods section;
  - are tests one-sided or two-sided?
  - are there adjustments for multiple comparisons?
  - exact statistical test results, e.g., P values = x but not P values < x;
  - definition of 'center values' as median or average;
  - definition of error bars as s.d. or s.e.m.

Any descriptions too long for the figure legend should be included in the methods section and/or with the source data.

In the pink boxes below, please ensure that the answers to the following questions are reported in the manuscript itself. Every question should be answered. If the question is not relevant to your research, please write NA (non applicable). We encourage you to include a specific subsection in the methods section for statistics, reagents, animal models and human subjects.

#### B- Statistics and general methods

Please fill out these boxes ↓ (Do not worry if you cannot see all your text once you press return)

|                                                                                                                                                                                         |     |
|-----------------------------------------------------------------------------------------------------------------------------------------------------------------------------------------|-----|
| 1.a. How was the sample size chosen to ensure adequate power to detect a pre-specified effect size?                                                                                     | N/A |
| 1.b. For animal studies, include a statement about sample size estimate even if no statistical methods were used.                                                                       | N/A |
| 2. Describe inclusion/exclusion criteria if samples or animals were excluded from the analysis. Were the criteria pre-established?                                                      | N/A |
| 3. Were any steps taken to minimize the effects of subjective bias when allocating animals/samples to treatment (e.g. randomization procedure)? If yes, please describe.                | N/A |
| For animal studies, include a statement about randomization even if no randomization was used.                                                                                          | N/A |
| 4.a. Were any steps taken to minimize the effects of subjective bias during group allocation or/and when assessing results (e.g. blinding of the investigator)? If yes please describe. | N/A |
| 4.b. For animal studies, include a statement about blinding even if no blinding was done                                                                                                | N/A |
| 5. For every figure, are statistical tests justified as appropriate?                                                                                                                    | N/A |
| Do the data meet the assumptions of the tests (e.g., normal distribution)? Describe any methods used to assess it.                                                                      | N/A |
| Is there an estimate of variation within each group of data?                                                                                                                            | N/A |

#### USEFUL LINKS FOR COMPLETING THIS FORM

<http://www.antibodypedia.com>  
<http://1degreebio.org>  
<http://www.equator-network.org/reporting-guidelines/improving-bioscience-research-repor>  
  
<http://grants.nih.gov/grants/olaw/olaw.htm>  
<http://www.mrc.ac.uk/Ourresearch/Ethicsresearchguidance/Useofanimals/index.htm>  
<http://ClinicalTrials.gov>  
<http://www.consort-statement.org>  
<http://www.consort-statement.org/checklists/view/32-consort/66-title>  
  
<http://www.equator-network.org/reporting-guidelines/reporting-recommendations-for-tum>  
  
<http://datadryad.org>  
  
<http://figshare.com>  
  
<http://www.ncbi.nlm.nih.gov/gap>  
  
<http://www.ebi.ac.uk/ega>  
  
<http://biomodels.net/>  
  
<http://biomodels.net/miriam/>  
<http://jij.biochem.sun.ac.za>  
[http://oba.od.nih.gov/biosecurity/biosecurity\\_documents.html](http://oba.od.nih.gov/biosecurity/biosecurity_documents.html)  
<http://www.selectagents.gov/>

|                                                                                   |     |
|-----------------------------------------------------------------------------------|-----|
| Is the variance similar between the groups that are being statistically compared? | N/A |
|-----------------------------------------------------------------------------------|-----|

### C- Reagents

|                                                                                                                                                                                                                                                                                                                                                                  |                                                       |
|------------------------------------------------------------------------------------------------------------------------------------------------------------------------------------------------------------------------------------------------------------------------------------------------------------------------------------------------------------------|-------------------------------------------------------|
| 6. To show that antibodies were profiled for use in the system under study (assay and species), provide a citation, catalog number and/or clone number, supplementary information or reference to an antibody validation profile. e.g., Antibodypedia ( <a href="#">see link list at top right</a> ), 1DegreeBio ( <a href="#">see link list at top right</a> ). | APPENDIX FIGURE S3, APPENDIX TABLE S1                 |
| 7. Identify the source of cell lines and report if they were recently authenticated (e.g., by STR profiling) and tested for mycoplasma contamination.                                                                                                                                                                                                            | Tested every few months for mycoplasma contamination. |

\* for all hyperlinks, please see the table at the top right of the document

### D- Animal Models

|                                                                                                                                                                                                                                                                                                                                                                                                                                          |     |
|------------------------------------------------------------------------------------------------------------------------------------------------------------------------------------------------------------------------------------------------------------------------------------------------------------------------------------------------------------------------------------------------------------------------------------------|-----|
| 8. Report species, strain, gender, age of animals and genetic modification status where applicable. Please detail housing and husbandry conditions and the source of animals.                                                                                                                                                                                                                                                            | N/A |
| 9. For experiments involving live vertebrates, include a statement of compliance with ethical regulations and identify the committee(s) approving the experiments.                                                                                                                                                                                                                                                                       | N/A |
| 10. We recommend consulting the ARRIVE guidelines ( <a href="#">see link list at top right</a> ) (PLoS Biol. 8(6), e1000412, 2010) to ensure that other relevant aspects of animal studies are adequately reported. See author guidelines, under 'Reporting Guidelines'. See also: NIH ( <a href="#">see link list at top right</a> ) and MRC ( <a href="#">see link list at top right</a> ) recommendations. Please confirm compliance. | N/A |

### E- Human Subjects

|                                                                                                                                                                                                                                                                                                                                                        |     |
|--------------------------------------------------------------------------------------------------------------------------------------------------------------------------------------------------------------------------------------------------------------------------------------------------------------------------------------------------------|-----|
| 11. Identify the committee(s) approving the study protocol.                                                                                                                                                                                                                                                                                            | N/A |
| 12. Include a statement confirming that informed consent was obtained from all subjects and that the experiments conformed to the principles set out in the WMA Declaration of Helsinki and the Department of Health and Human Services Belmont Report.                                                                                                | N/A |
| 13. For publication of patient photos, include a statement confirming that consent to publish was obtained.                                                                                                                                                                                                                                            | N/A |
| 14. Report any restrictions on the availability (and/or on the use) of human data or samples.                                                                                                                                                                                                                                                          | N/A |
| 15. Report the clinical trial registration number (at ClinicalTrials.gov or equivalent), where applicable.                                                                                                                                                                                                                                             | N/A |
| 16. For phase II and III randomized controlled trials, please refer to the CONSORT flow diagram ( <a href="#">see link list at top right</a> ) and submit the CONSORT checklist ( <a href="#">see link list at top right</a> ) with your submission. See author guidelines, under 'Reporting Guidelines'. Please confirm you have submitted this list. | N/A |
| 17. For tumor marker prognostic studies, we recommend that you follow the REMARK reporting guidelines ( <a href="#">see link list at top right</a> ). See author guidelines, under 'Reporting Guidelines'. Please confirm you have followed these guidelines.                                                                                          | N/A |

### F- Data Accessibility

|                                                                                                                                                                                                                                                                                                                                                                                                                                                                                                                                                                                                                                                                                                                                                         |     |
|---------------------------------------------------------------------------------------------------------------------------------------------------------------------------------------------------------------------------------------------------------------------------------------------------------------------------------------------------------------------------------------------------------------------------------------------------------------------------------------------------------------------------------------------------------------------------------------------------------------------------------------------------------------------------------------------------------------------------------------------------------|-----|
| 18. Provide a "Data Availability" section at the end of the Materials & Methods, listing the accession codes for data generated in this study and deposited in a public database (e.g. RNA-Seq data: Gene Expression Omnibus GSE39462, Proteomics data: PRIDE PXD000208 etc.) Please refer to our author guidelines for 'Data Deposition'.<br><br>Data deposition in a public repository is mandatory for:<br>a. Protein, DNA and RNA sequences<br>b. Macromolecular structures<br>c. Crystallographic data for small molecules<br>d. Functional genomics data<br>e. Proteomics and molecular interactions                                                                                                                                              | N/A |
| 19. Deposition is strongly recommended for any datasets that are central and integral to the study; please consider the journal's data policy. If no structured public repository exists for a given data type, we encourage the provision of datasets in the manuscript as a Supplementary Document (see author guidelines under 'Expanded View' or in unstructured repositories such as Dryad ( <a href="#">see link list at top right</a> ) or Figshare ( <a href="#">see link list at top right</a> ).                                                                                                                                                                                                                                              | N/A |
| 20. Access to human clinical and genomic datasets should be provided with as few restrictions as possible while respecting ethical obligations to the patients and relevant medical and legal issues. If practically possible and compatible with the individual consent agreement used in the study, such data should be deposited in one of the major public access-controlled repositories such as dbGAP ( <a href="#">see link list at top right</a> ) or EGA ( <a href="#">see link list at top right</a> ).                                                                                                                                                                                                                                       | N/A |
| 21. Computational models that are central and integral to a study should be shared without restrictions and provided in a machine-readable form. The relevant accession numbers or links should be provided. When possible, standardized format (SBML, CellML) should be used instead of scripts (e.g. MATLAB). Authors are strongly encouraged to follow the MIRIAM guidelines ( <a href="#">see link list at top right</a> ) and deposit their model in a public database such as Biocompare ( <a href="#">see link list at top right</a> ) or JWS Online ( <a href="#">see link list at top right</a> ). If computer source code is provided with the paper, it should be deposited in a public repository or included in supplementary information. | N/A |

### G- Dual use research of concern

|                                                                                                                                                                                                                                                                                                                                   |     |
|-----------------------------------------------------------------------------------------------------------------------------------------------------------------------------------------------------------------------------------------------------------------------------------------------------------------------------------|-----|
| 22. Could your study fall under dual use research restrictions? Please check biosecurity documents ( <a href="#">see link list at top right</a> ) and list of select agents and toxins (APHIS/CDC) ( <a href="#">see link list at top right</a> ). According to our biosecurity guidelines, provide a statement only if it could. | N/A |
|-----------------------------------------------------------------------------------------------------------------------------------------------------------------------------------------------------------------------------------------------------------------------------------------------------------------------------------|-----|
